# Supplementary material for: Quantifying and communicating uncertain climate change hazards in participatory climate change adaptation processes
Source: Copernicus journal article supplement (doi:10.5194/gc-7-121-2024), 2024-05-24
Supplement: Supplementary file 1 [file gc-7-121-2024-supplement.pdf]

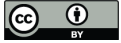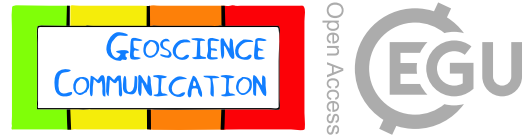

*Supplement of*

## **Quantifying and communicating uncertain climate change hazards in participatory climate change adaptation processes**

**Laura Müller and Petra Döll**

*Correspondence to:* Laura Müller ([la.mueller@em.uni-frankfurt.de](mailto:la.mueller@em.uni-frankfurt.de))

The copyright of individual parts of the supplement might differ from the article licence.

## **S.1 Study area**

The UNESCO biosphere reserve Rhön (BRR) is located in Central Germany at the border triangle of Hesse, Thuringia, and Bavaria and covers an area of 2,433 km<sup>2</sup> (Biosphärenreservat Rhön, 2018; Figure 2). Numerous small and large water suppliers cover the local water demand mainly with spring water and groundwater and deliver water to surrounding regions (Schönthaler and Andrian-Werbung, 2008). The per-capita water demand is similar to the German average, and water resources are currently sufficient to fulfill the demand without overexploitation (Schönthaler and Andrian-Werbung, 2008). There are many springs, creeks, and upper reaches of streams in the UNESCO biosphere reserve Rhön that are valuable aquatic ecosystems due to being near-natural and due to their structural diversity; they are the habitat for many rare and protected species (Biosphärenreservat Rhön, 2018; Schönthaler and Andrian-Werbung, 2008). Until May 2018, 2,097 animal species were determined in 3,229 springs (Zaenker and Reiss, 2018), out of the estimated 10,000 springs in the BRR (Biosphärenreservat Rhön, 2018).

Climate change leads to less snowfall in the BRR, and winter precipitation is potentially increasing, leading to more runoff in winter (Schönthaler and Andrian-Werbung, 2008). Summer precipitation is potentially decreasing and evapotranspiration increasing, leading to lower surface water and groundwater levels and flows as well as to drying of springs in the summer, with negative effects on aquatic ecosystems and human water supply (Schönthaler and Andrian-Werbung, 2008). From 2018 to 2020, the BRR faced three extraordinarily dry summers. In interviews in October, November, and December 2020 (Section 2.2.1), the stakeholders reported below-average streamflow, declining (ground)water levels, declining spring discharge, dried-out creeks and springs as well as ordinances to limit water use and difficulties in the public water supply in some BRR regions (Rhön-Grabfeld).

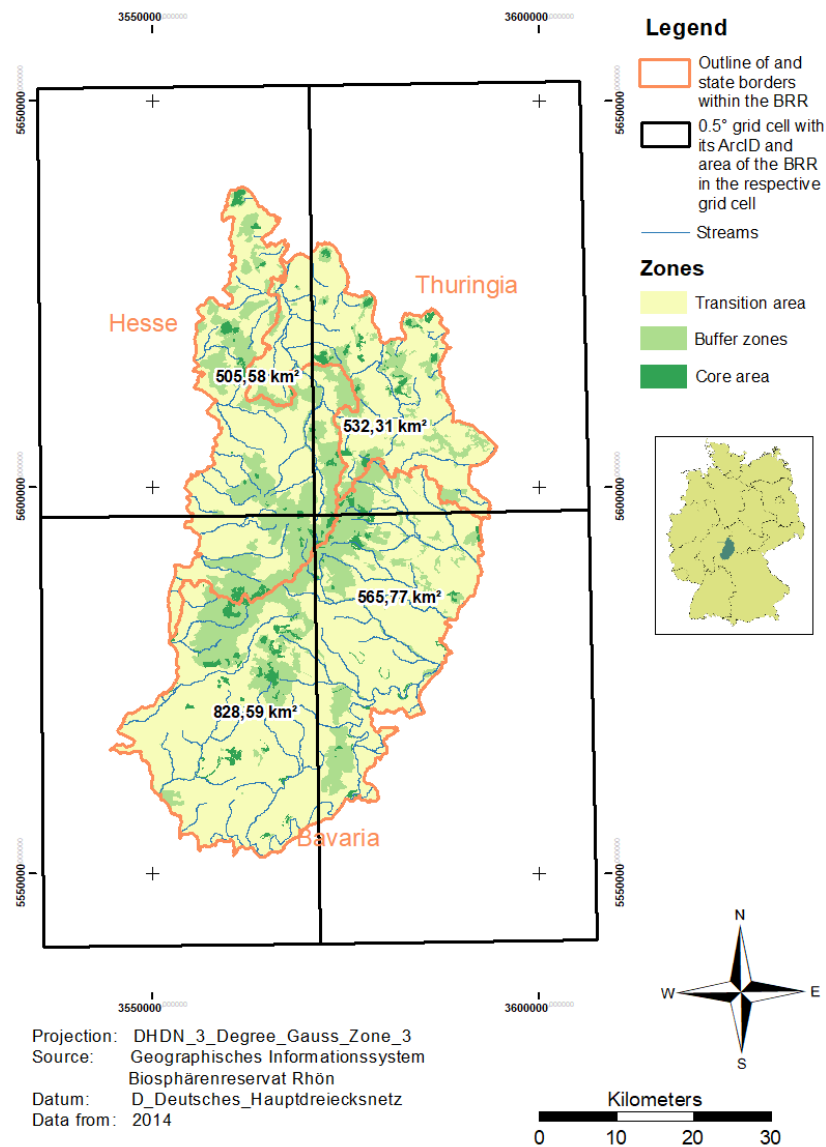

Figure S1. Map of the study area, the UNESCO biosphere reserve Rhön (BRR), and its location in the  $0.5^\circ$  grid cells of the global hydrological models. The figure of the location of the BRR within Germany stems from a figure in Zaenker and Reiss (2018, p. 35).

## S.2 Questionnaire for the evaluation of our communication format by the audiences of two presentations of the project results

This is the original questionnaire to let the audiences of two presentations of the project results evaluate our communication format in comparison to a more common communication format, which is why it is in German. The English translations of the questions can be found in Figures 8 and 9.

### 1. Einverständniserklärung

Die Evaluation ist anonym. Ich erkläre mich einverstanden, dass die erhobenen Daten anonym veröffentlicht werden dürfen.

- Ja  
 Nein

**2. Wie sehr treffen folgende Aussagen Ihrer Meinung nach zu? Bitte nur ein Kreuz pro Aussage setzen.**

|                                                                                                                                                                                                              | Ich stimme voll und ganz zu | Ich stimme eher zu       | Ich stimme weder zu noch stimme ich nicht zu | Ich stimme eher nicht zu | Ich stimme überhaupt nicht zu |
|--------------------------------------------------------------------------------------------------------------------------------------------------------------------------------------------------------------|-----------------------------|--------------------------|----------------------------------------------|--------------------------|-------------------------------|
| Durch die gerade vorgestellten Ergebnisse (Abbildungen) habe ich ein <b>besseres Verständnis der potentiellen Änderungen</b> der Wasserressourcen durch den Klimawandel im Biosphärenreservat Rhön erhalten. | <input type="checkbox"/>    | <input type="checkbox"/> | <input type="checkbox"/>                     | <input type="checkbox"/> | <input type="checkbox"/>      |
| Durch die gerade vorgestellten Ergebnisse (Abbildungen) habe ich ein <b>besseres Verständnis, welche Unsicherheiten</b> die abgeschätzten Änderungen haben, erhalten.                                        | <input type="checkbox"/>    | <input type="checkbox"/> | <input type="checkbox"/>                     | <input type="checkbox"/> | <input type="checkbox"/>      |

**3. Bitte beantworten Sie die folgenden Fragen aus Ihrer Sicht. Bitte nur ein Kreuz pro Frage setzen.**

|                                                                                                                                                                                                                           | Abbildung                | Tabellen                 | Kein Unterschied         |
|---------------------------------------------------------------------------------------------------------------------------------------------------------------------------------------------------------------------------|--------------------------|--------------------------|--------------------------|
| Welche der beiden Darstellungen (Abbildung oder Tabellen) war besser geeignet, um Ihr Verständnis der <b>potentiellen Änderungen</b> der Wasserressourcen durch den Klimawandel im Biosphärenreservat Rhön zu verbessern? | <input type="checkbox"/> | <input type="checkbox"/> | <input type="checkbox"/> |
| Welche der beiden Darstellungen (Abbildung oder Tabellen) war besser geeignet, um Ihr Verständnis, welche <b>Unsicherheiten</b> die abgeschätzten Änderungen haben, zu verbessern?                                        | <input type="checkbox"/> | <input type="checkbox"/> | <input type="checkbox"/> |

## References

- Biosphärenreservat Rhön (Regierung von Unterfranken, Bayerische Verwaltungsstelle, Landkreis Fulda, Hessische Verwaltungsstelle and Thüringische Verwaltungsstelle, Propstei Zella/Rhön) (Eds.): Neues Rahmenkonzept UNESCO-Biosphärenreservat Rhön: Band I - Wo stehen wir? - Status Quo der nachhaltigen Entwicklung, 347 pp., 2018.
- Schönthaler, K., and Andrian-Werburg, S. v.: Erster integrierter Umweltbericht für das länderübergreifende UNESCO-Biosphärenreservat Rhön (Langfassung), Bayerisches Staatsministerium für Umwelt, Gesundheit und Verbraucherschutz (BaySt-MUGV), Hessisches Ministerium für Umwelt, ländlichen Raum und Verbraucherschutz (HMULV), and Thüringer Ministerium für Landwirtschaft, Naturschutz und Umwelt (TMLNU), Germany, 2008.
- Zaenker, S., and Reiss, M.: Quellen der Rhön - Ein bedrohter und schützenswerter Lebensraum, Hessische Verwaltungsstelle Biosphärenreservat Rhön, Landkreis Fulda, Germany, 2018.
